# Supplementary material
Source: PubMed Central journal article supplement (PMC6945803)
Supplement: NIHMS1065238-supplement-supplemental.pdf [file NIHMS1065238-supplement-supplemental.pdf]

# Supplementary Fig. 1

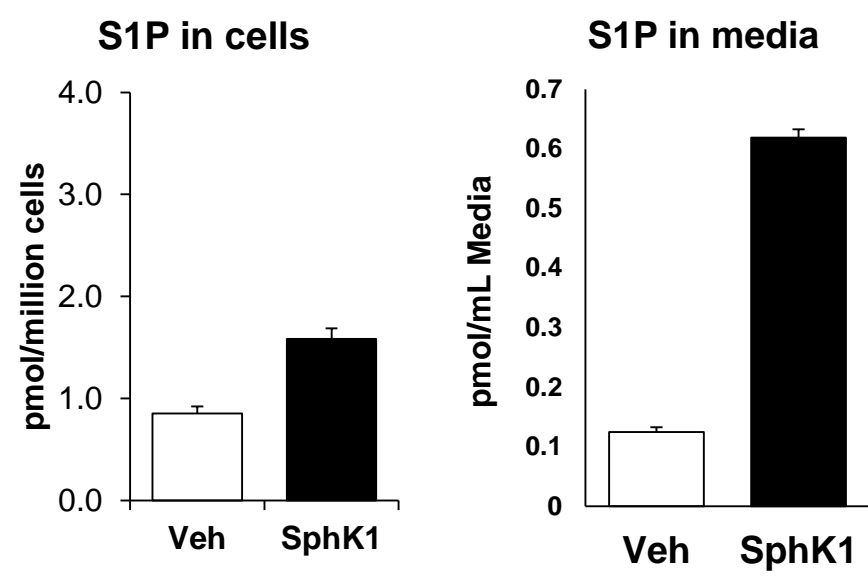

- 1 **Supplementary Fig. 1.** S1P levels were measured in cells and media from the MBA-
- 2 MD231 breast cancer cells with SphK1-overexpression and vehicle (Veh).
